# Supplementary material for: 52-Week Efficacy and Safety of Telbivudine with Conditional Tenofovir Intensification at Week 24 in HBeAg-Positive Chronic Hepatitis B
Source: PubMed Central journal article supplement (PMC3563589; doi:10.1371/journal.pone.0054279), 2013-02-04
Supplement: pone.0054279.s001.pdf [file pone.0054279.s001.pdf]

Table S1. List of ethics committees/institutional review boards

| <b>Committee or board</b>                                                                                   | <b>Department/organization</b>                                                                   | <b>Address</b>                                  |
|-------------------------------------------------------------------------------------------------------------|--------------------------------------------------------------------------------------------------|-------------------------------------------------|
| Comissão de Ética para Análise de Projetos de Pesquisa do HCFMUSP e FMUSP                                   | Diretoria Clínica do Hospital das Clínicas da Faculdade de Medicina da Universidade de São Paulo | São Paulo SP<br>05403-010<br>Brazil             |
| Institutional Review Board, Faculty of Medicine, Chulalongkorn University                                   |                                                                                                  | Bangkok Bangkok<br>10330<br>Thailand            |
| Siriraj Ethics Committee                                                                                    |                                                                                                  | Bangkok Bangkok<br>10700<br>Thailand            |
| Ethik-Kommission des Landes Berlin                                                                          | Landesamt fuer Gesundheit und Soziales                                                           | Berlin Berlin<br>10707<br>Germany               |
| Comitê de Ética em Pesquisa HCRP e FMRP-USP                                                                 | Hospital das Clínicas da Faculdade de Medicina de Ribeirão Preto da Universidade de São Paulo    | Ribeirão Preto SP<br>14048-900<br>Brazil        |
| Ethik-Kommission                                                                                            | Aerztekammer Hamburg                                                                             | Hamburg Hamburg 22083<br>Germany                |
| Ethik-Kommission                                                                                            | Medizinische Hochschule Hannover                                                                 | Hannover<br>Niedersachsen<br>30625<br>Germany   |
| The Khon Kaen University Ethics Committee For Human Research                                                |                                                                                                  | Khon Kaen Khon<br>Kaen 40002<br>Thailand        |
| Ethik-Kommission                                                                                            | Fachbereichs Medizin der Johann Wolfgang Goethe-Universität                                      | Frankfurt am Main<br>Hessen<br>Germany          |
| Comissão Científica e Comissão de Pesquisa e Ética em Saúde                                                 | Grupo de Pesquisa e Pós-Graduação                                                                | Porto Alegre RS Brazil                          |
| Comité Independiente de Etica para Ensayos en Farmacología Clínica                                          | Pte. J. E. Uriburu 774, 1st Floor                                                                | Buenos Aires Buenos Aires C1027AAP<br>Argentina |
| Joint The Chinese University of Hong Kong - New Territories East Cluster Clinical Research Ethics Committee |                                                                                                  | Hong Kong                                       |
| Comité Independiente de Etica Hospital Provincial del Centenario                                            | Santa Fe 3100                                                                                    | Rosario Santa Fe<br>2000<br>Argentina           |
| Fundación Favaloro                                                                                          | Av. Belgrano 1746                                                                                | Buenos Aires Buenos Aires C1093AAS<br>Argentina |
| Kowloon West Cluster Clinical Research Ethics Committee                                                     |                                                                                                  | Hong Kong                                       |
| Ethics Committee, Faculty of Medicine, Prince of Songkla University                                         |                                                                                                  | Songkla Songkla<br>90110<br>Thailand            |
